# Supplementary material for: Integration of visual and antennal mechanosensory feedback during head stabilization in hawkmoths
Source: eLife journal article supplement (doi:10.7554/elife.78410), 2022-06-27
Supplement: supp [file elife-78410-supp-v1.zip]

|                                                                                   |                                                                                     |                    |             |                |             |
|-----------------------------------------------------------------------------------|-------------------------------------------------------------------------------------|--------------------|-------------|----------------|-------------|
|  |                                                                                     | Twilight condition |             |                |             |
|  |                                                                                     | Dark condition     |             |                |             |
|                                                                                   |                                                                                     | Low Frequency      |             | High frequency |             |
|                                                                                   |                                                                                     | Gain               | Phase (deg) | Gain           | Phase (deg) |
| CASE 1                                                                            |    |                    |             |                |             |
|                                                                                   |    |                    |             |                |             |
| Intact visual feedback<br>Intact antennal<br>mechanosensory feedback              |                                                                                     | 0.6                | 177.6       | 0.4            | 173.7       |
| CASE 2                                                                            |    |                    |             |                |             |
|                                                                                   |    |                    |             |                |             |
| Reduced visual feedback<br>Intact antennal<br>mechanosensory feedback             |                                                                                     | 0.4                | 302.4       | 0.4            | 214.2       |
| CASE 3                                                                            |    |                    |             |                |             |
|                                                                                   |    |                    |             |                |             |
| Intact visual feedback<br>Reduced antennal<br>mechanosensory feedback             |                                                                                     | 0.6                | 174         | 0.5            | 127.8       |
| CASE 4                                                                            |   |                    |             |                |             |
|                                                                                   |   |                    |             |                |             |
| Reduced visual feedback<br>Reduced antennal<br>mechanosensory feedback            |                                                                                     | 0.1                | N.A         | 0.1            | N.A         |
| CASE 5                                                                            |  |                    |             |                |             |
|                                                                                   |  |                    |             |                |             |
| Intact visual feedback<br>Restored antennal<br>mechanosensory feedback            |                                                                                     | 0.6                | 177         | 0.4            | 149.4       |
| CASE 6                                                                            |  |                    |             |                |             |
|                                                                                   |  |                    |             |                |             |
| Reduced visual feedback<br>Restored antennal<br>mechanosensory feedback           |                                                                                     | 0.3                | 297.6       | 0.3            | 216         |
