# Supplementary material for: Integration of visual and antennal mechanosensory feedback during head stabilization in hawkmoths
Source: eLife journal article supplement (doi:10.7554/elife.78410), 2022-06-27

□ twilight condition  
 ■ dark condition  
 C: Control  
 FC: Flagella-clipped  
 FR: Flagella-reattached  
 \*\*  $p < 0.01$ ,  
 Kruskal-Wallis test followed by Nemenyi test

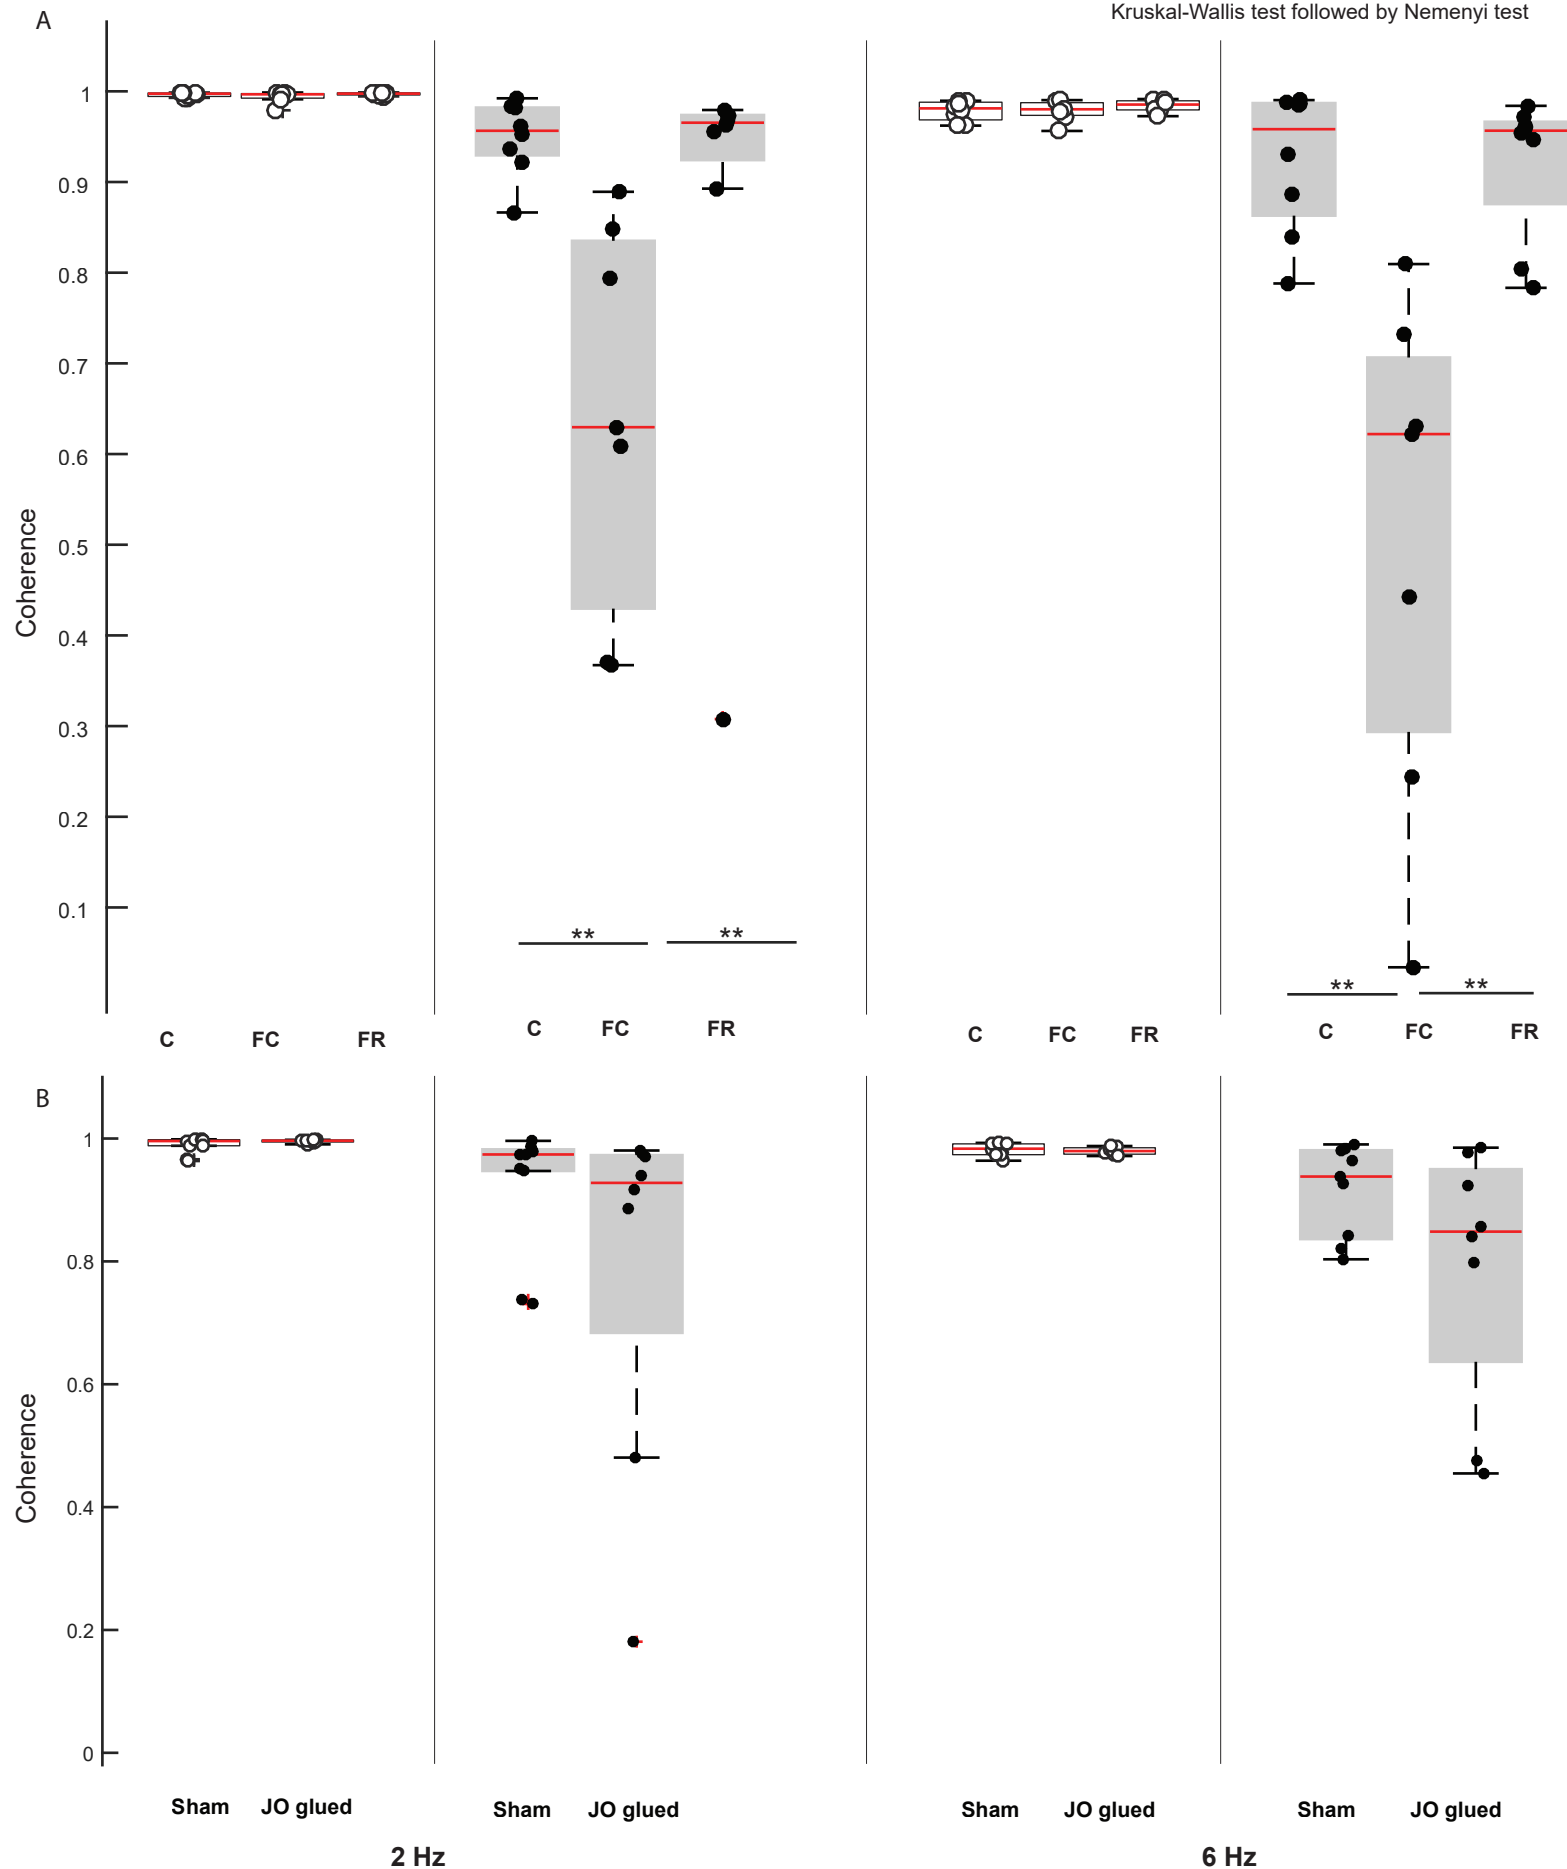

Supplement: supp [file elife-78410-supp-v1.zip]
