# Supplementary figures and images for: Integration of visual and antennal mechanosensory feedback during head stabilization in hawkmoths
Source: eLife journal article supplement (doi:10.7554/elife.78410), 2022-06-27

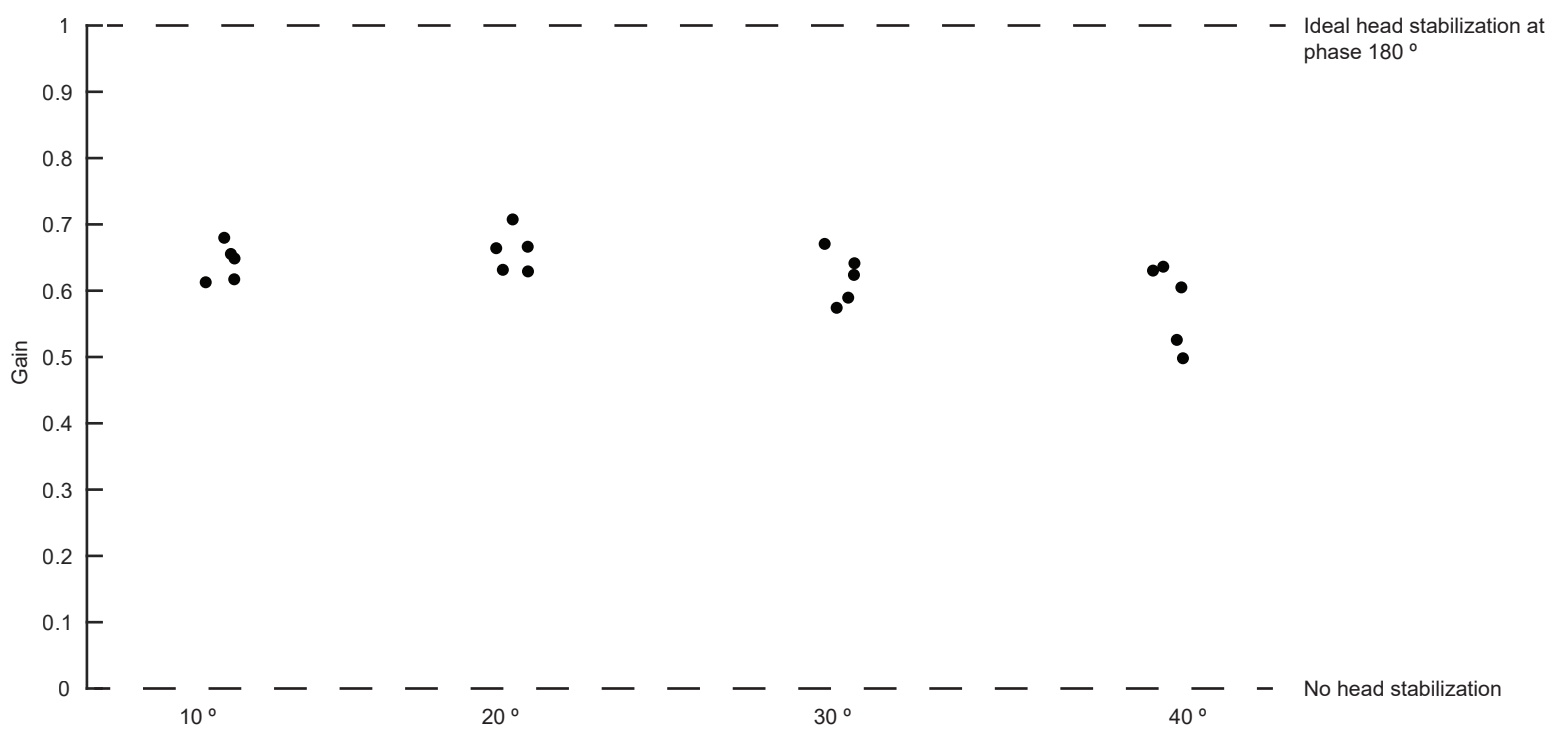

Supplement: supp [file elife-78410-supp-v1.zip]

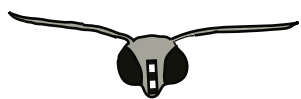

2 Hz

—  $\theta_{\text{thorax}}$  (stimulus)  
—  $\theta_{\text{head-thorax}}$

□ twilight condition

■ dark condition

6 Hz

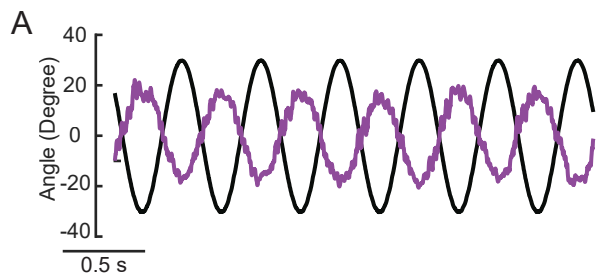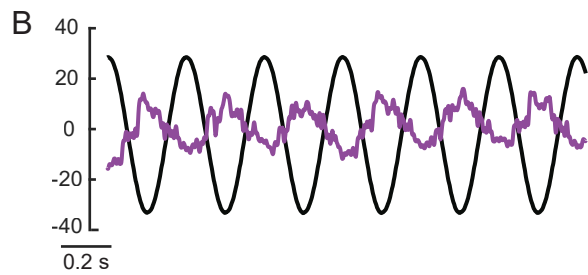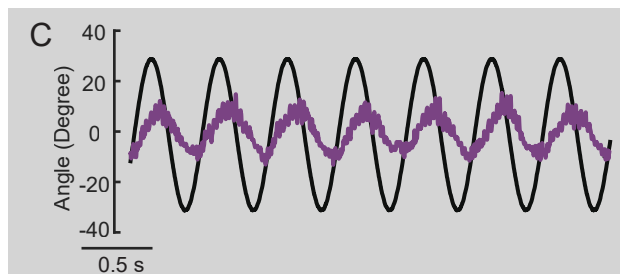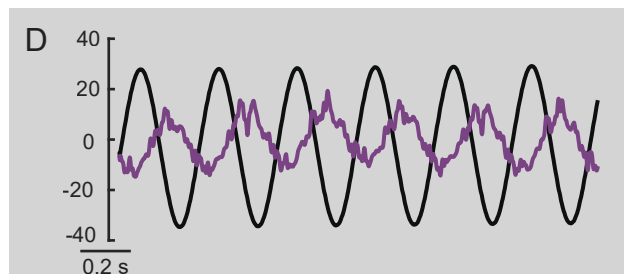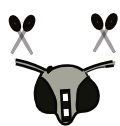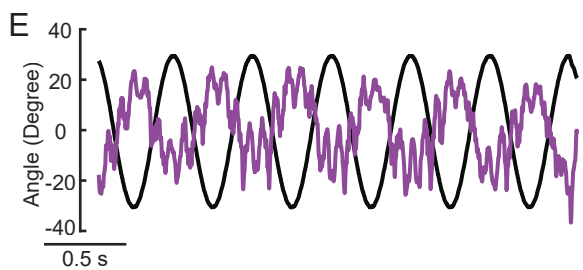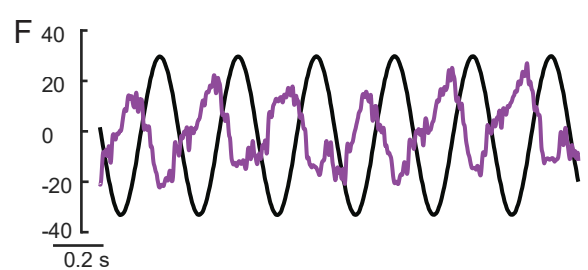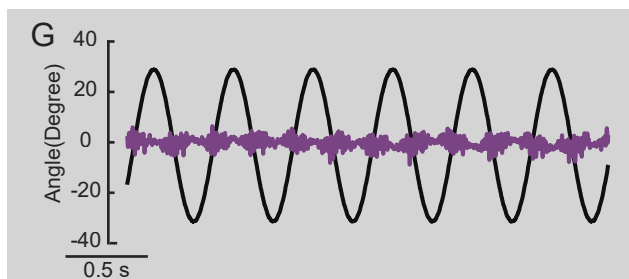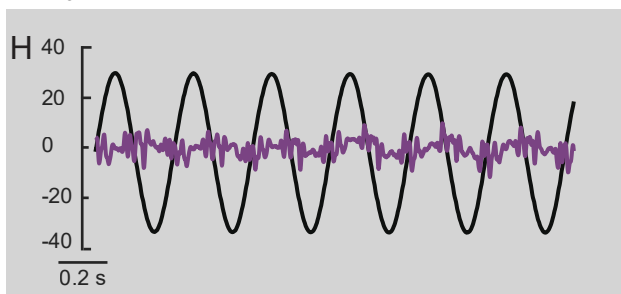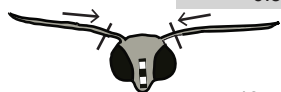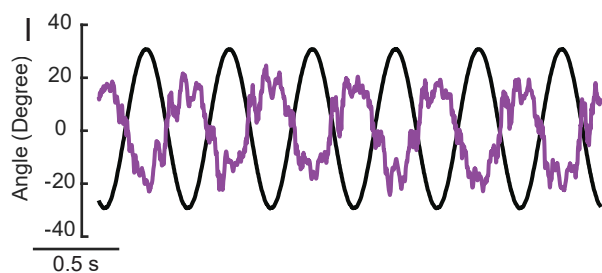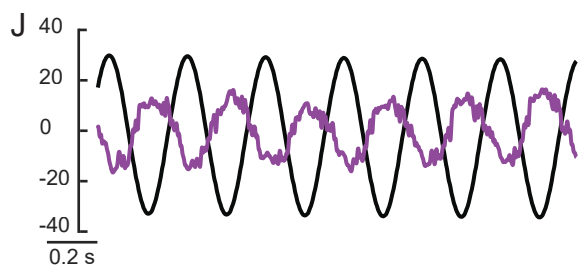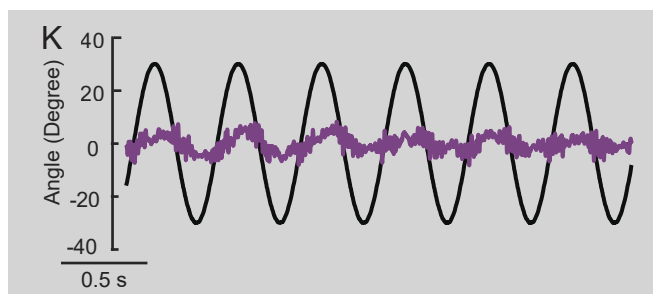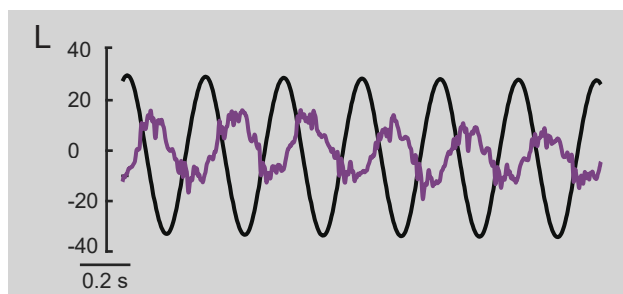

Supplement: supp [file elife-78410-supp-v1.zip]

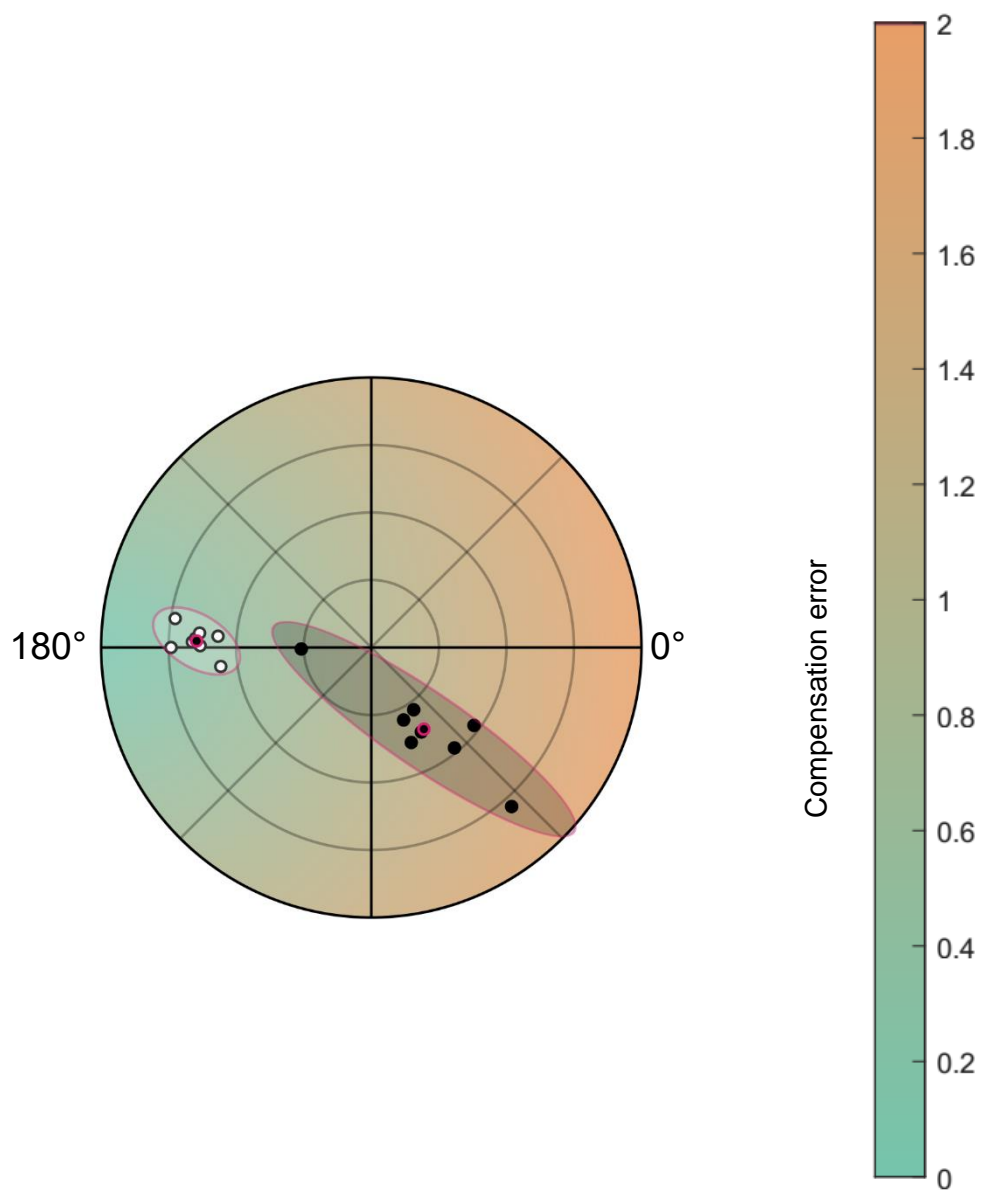

Supplement: supp [file elife-78410-supp-v1.zip]

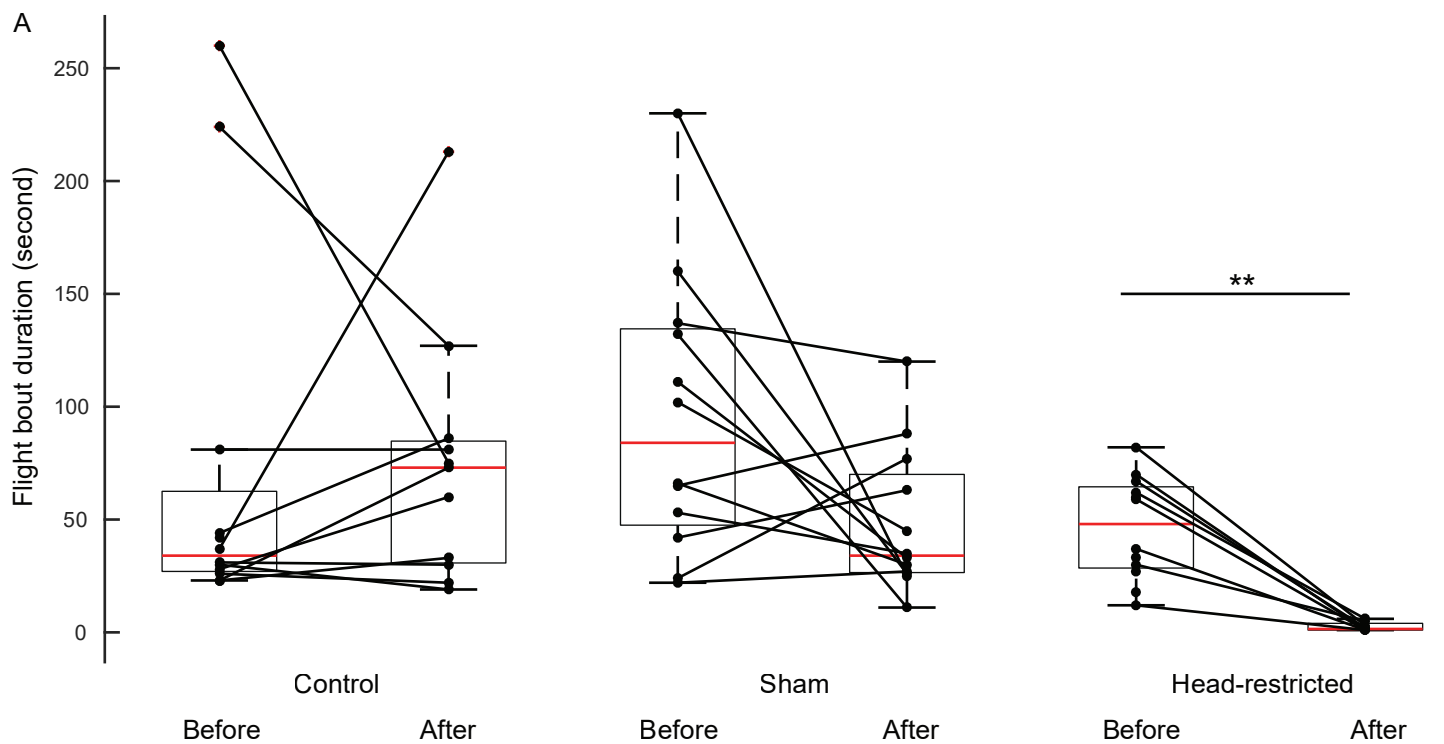

\*\*  $p < 0.01$ , Wilcoxon signed-rank test

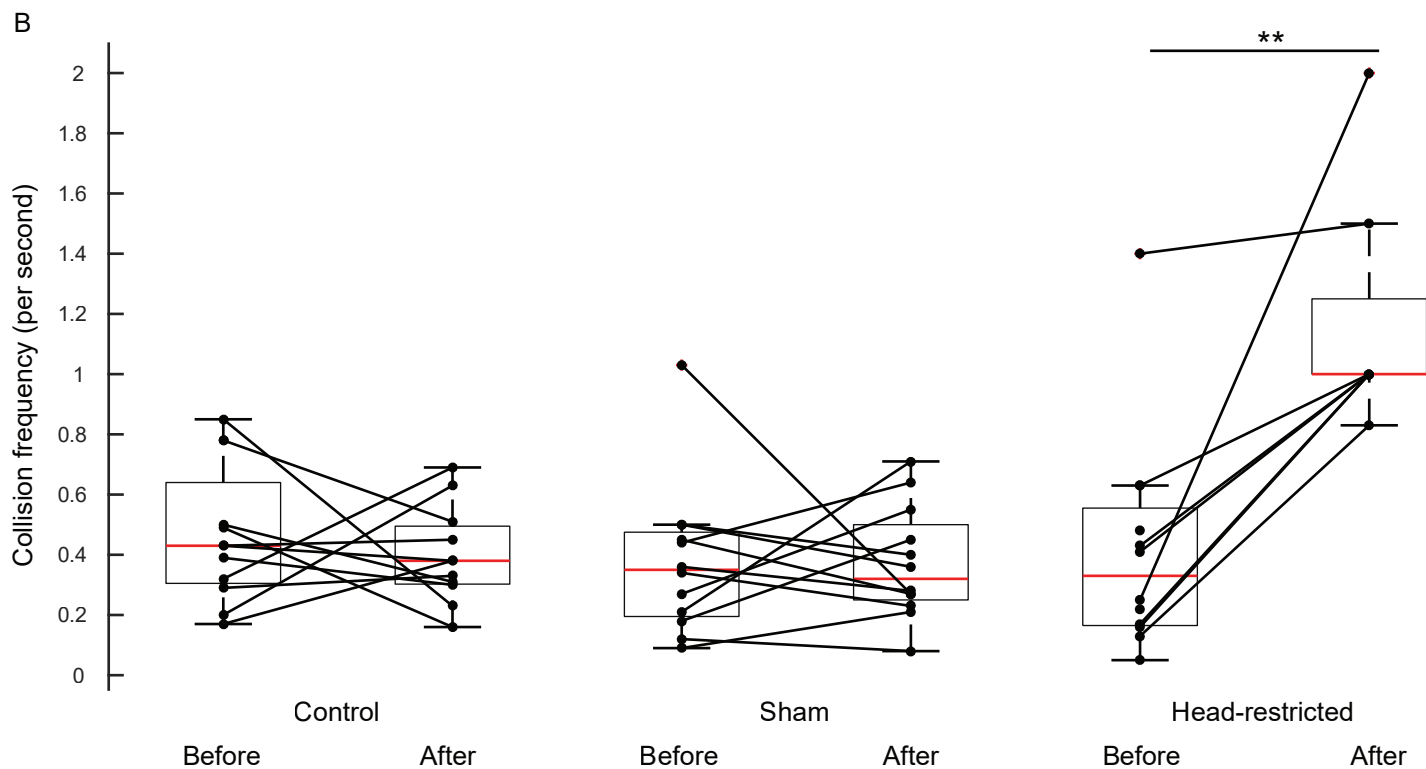

Supplement: supp [file elife-78410-supp-v1.zip]

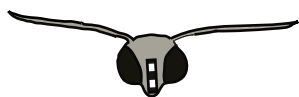

A

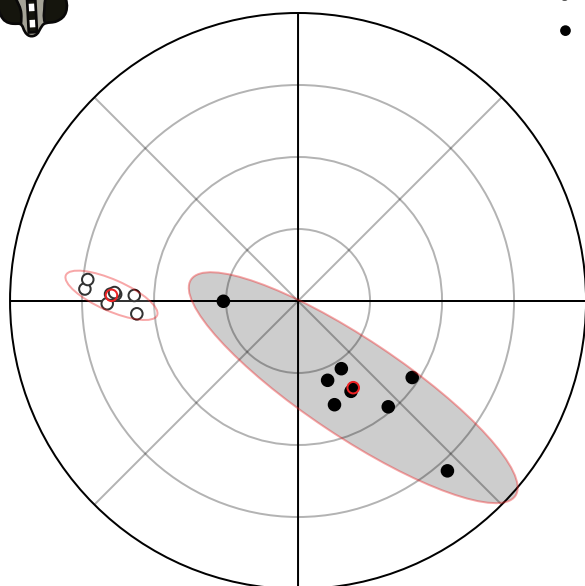

○ twilight condition  
● dark condition

B

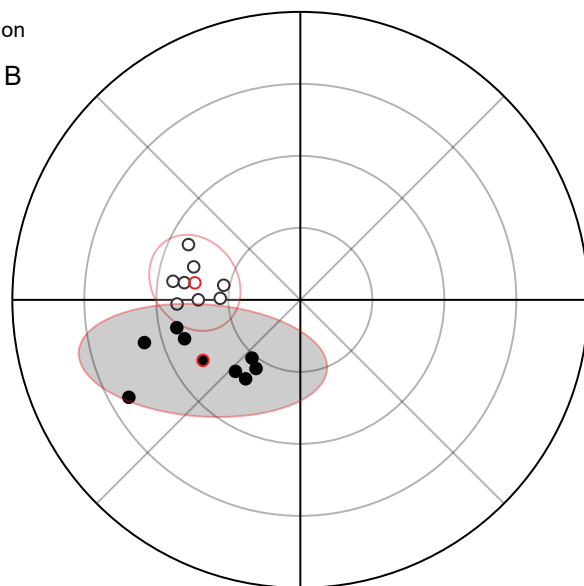

C

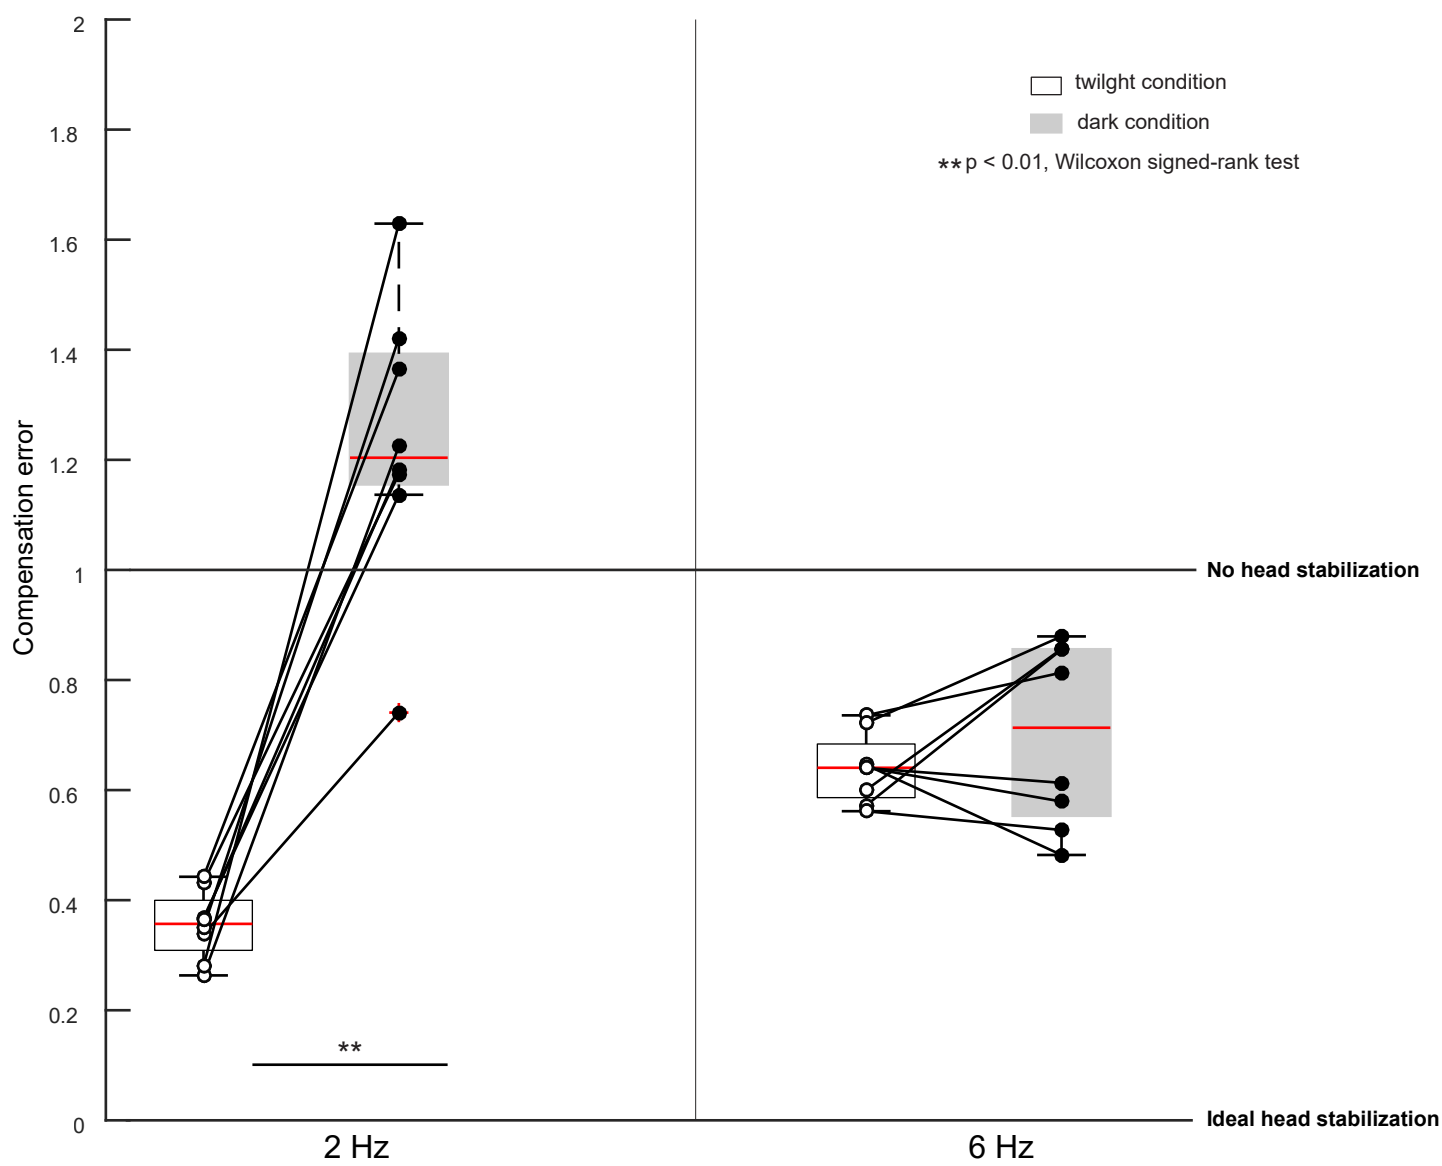

Supplement: supp [file elife-78410-supp-v1.zip]

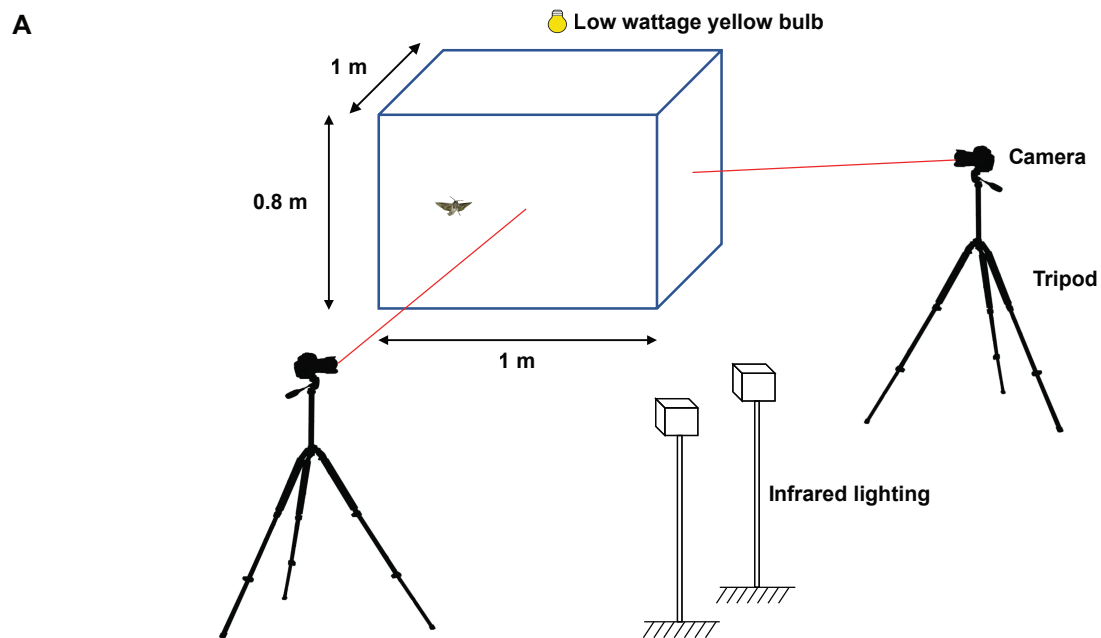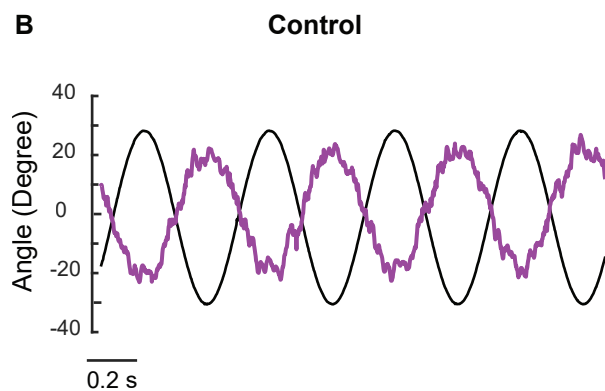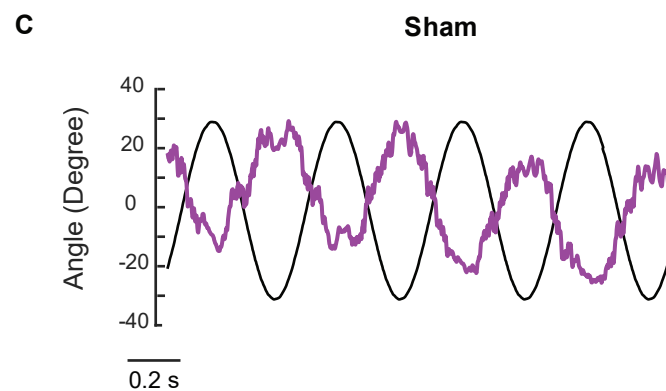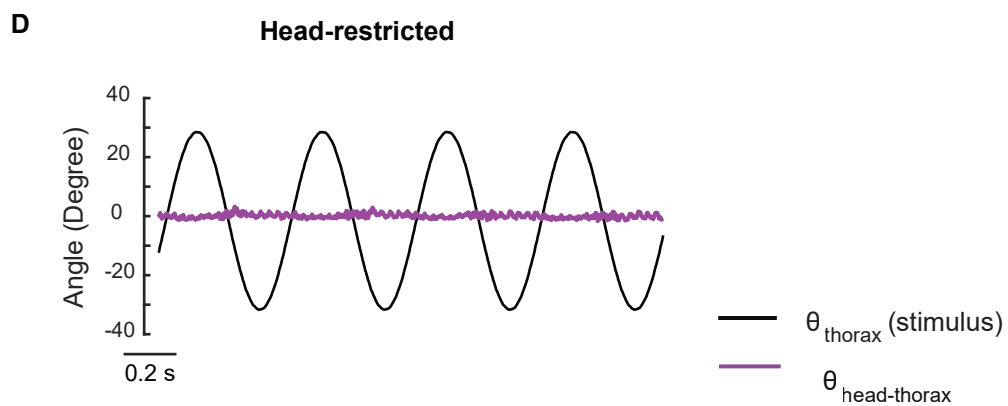

Supplement: supp [file elife-78410-supp-v1.zip]

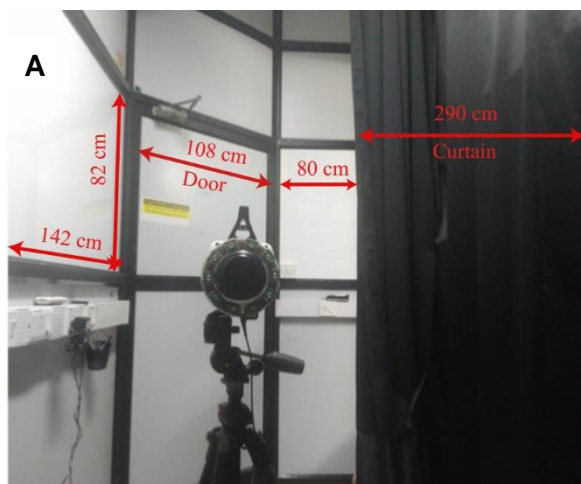

**A**  
View of the laboratory environment in front of the moths

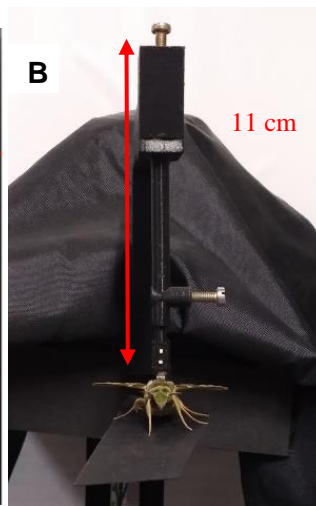

**B**  
Image of the set-up

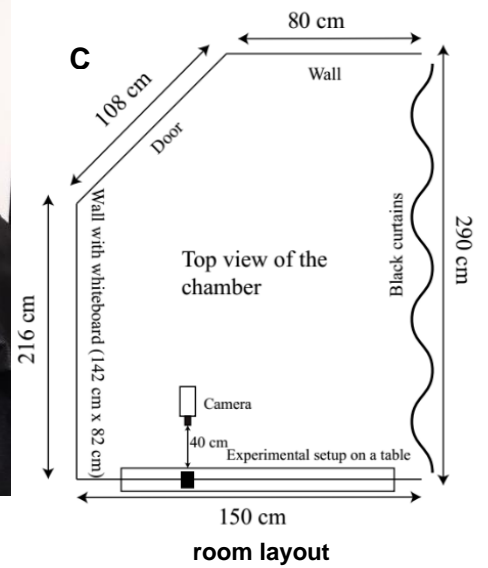

Supplement: supp [file elife-78410-supp-v1.zip]
